# Memory in trait macroevolution

Emma E. Goldberg\*

Department of Ecology, Evolution & Behavior; University of Minnesota; Saint Paul, MN

Jasmine Foo\*

Department of Mathematics; University of Minnesota; Minneapolis, MN

November 6, 2018

\* The authors contributed equally to this work.

Correspondence: [jyfoo@umn.edu](mailto:jyfoo@umn.edu), [eeg@umn.edu](mailto:eeg@umn.edu)

*Running head:* Memory in trait macroevolution

*Keywords:* comparative methods, trait evolution, phylogenetics, renewal process

Submitted to the *American Naturalist* as an invited symposium article.

## Abstract

2           The history of a trait within a lineage may influence its future evolutionary trajec-  
4           tory, but macroevolutionary theory of this process is not well developed. For example,  
6           consider the simple binary trait of living in cave versus surface habitat. The longer  
8           a species has been cave-dwelling, the more may accumulated loss of vision, pigmen-  
10          tation, and defense restrict future adaptation if the species encounters the surface  
12          environment. However, the Markov model of discrete trait evolution that is widely  
14          adopted in phylogenetics does not allow the rate of cave-to-surface transition to de-  
16          crease with longer duration as a cave-dweller. Here, we describe three models of  
            evolution that remove this ‘memory-less’ constraint, using a renewal process to gen-  
            eralize beyond the typical Poisson process of discrete trait macroevolution. We then  
            show how the two-state renewal process can be used for inference, and we investi-  
            gate the potential of phylogenetic comparative data to reveal different influences of  
            trait duration, or ‘memory’ in trait evolution. We hope that such approaches may  
            open new avenues for modeling trait evolution and for broad comparative tests of  
            hypotheses that some traits become entrenched.

## Introduction

18 One style of studying trait macroevolution is to investigate commonalities in how a trait evolves  
across diverse lineages. By abstracting away the ecological and evolutionary processes that act  
20 on short timescales, a single question can be posed across hundreds of species and millions of  
years. For example, one big question is whether the evolution of certain traits is irreversible (Bull  
22 and Charnov 1985). Existing models of transitions among categorical trait values can test this  
question on phylogenetic data (Lewis 2001; Nosil and Mooers 2005; Goldberg and Igić 2008),  
24 focusing on the emergent pattern of trait evolution asymmetry while sweeping aside details like  
how it is caused by asymmetry in selective regime shifts or in the capacity to adapt to such  
26 shifts. Similarly, phylogenetic comparative methods are available to ask many other questions  
about trait macroevolution, such as whether traits change more rapidly in some clades than  
28 others (O'Meara et al. 2006; Beaulieu et al. 2013), or whether traits tend to change more during  
speciation than within single lineages (Bokma 2008; Goldberg and Igić 2012; Magnuson-Ford  
30 and Otto 2012). Such abstracted models have been very useful, both because they are simple  
enough to be interpreted broadly and because they can be fit statistically to large phylogenetic  
32 datasets. But traits may also evolve in emergent modes that are not captured by existing models.  
Here, we suggest that a different dynamic of trait evolution may also be widely applicable and  
34 mathematically tractable.

Our focal question is, does the length of time a lineage has held a trait value affect the chance  
36 of the trait changing in the future? At the macroevolutionary scale, we envision this pattern  
as the result of two components. In the first component, time spent in one state may lead to  
38 increased fit to that state. One possible mechanism is an accumulation of adaptive changes. For  
example, flowers can become increasingly suited to long-tongued pollinators via gradual elon-  
40 gation of nectar spurs and petal color changes from purple to red to white (Whittall and Hodges  
2007). Or focusing on the genetic level, fusions that unite loci determining sex with loci experi-  
42 encing sexually antagonistic selection can eventually create heteromorphic sex chromosomes in  
species with separate male and female individuals (Charlesworth 2015). Another possible mech-  
44 anism is gradual degradation through disuse. For example, vision genes are downregulated  
in recently-derived cave-dwelling fish populations and accumulate loss-of-function mutations in  
46 older cavefish species (Niemiller et al. 2013; McGaugh et al. 2014). In the second component,  
increased commitment to one state may reduce the chance of changing to another state. In par-

48 ticular, it could take longer to reverse the evolution of more extensive adaptations or losses. This  
logic seems reasonable and has some theoretical basis (Marshall et al. 1994), but well-supported  
50 empirical examples are elusive. For the sex chromosome example above, flowering plant species  
with heteromorphic sex chromosomes appear less likely to transition back to hermaphroditism  
52 than do other dioecious species (Goldberg et al. 2017). For the other examples above, the logic  
would be that species with longer nectar spurs would be less able to change to short-tongued  
54 pollinators when the pollination environment shifted to bees, or cavefishes with more exten-  
sive loss of vision and pigmentation would be less able to establish surface populations when  
56 washed into aboveground habitats. More broadly, macroevolutionary studies frequently focus on  
widely-recorded and ecologically-important traits (e.g., diet, habitat, reproductive or life history  
58 strategy) that are underlain by an assortment of morphological, physiological, and behavioral  
attributes with complex genetic bases. If these attributes accumulate gradually and inhibit sub-  
60 sequent changes in the focal trait, it may be common for the history of a trait within a lineage to  
affect its propensity for evolutionary change in the future.

62 Although it seems intuitively reasonable that a lineage's duration in one state could affect  
the chance of change to another state, this dynamic is absent from the model that dominates  
64 phylogenetic studies of discrete trait evolution. In the existing model, evolutionary changes  
between states occur as jumps with specified probabilities (Pagel 1994; Lewis 2001). Variations  
66 on the theme are numerous. State space can be structured to accommodate everything from  
codons to geographic ranges to correlations between multiple traits, rates of state change can  
68 depend on time or clade, and trait evolution can interact with the speciation-extinction process  
(Felsenstein 1981; Goldman and Yang 1994; Pagel 1994; Ree et al. 2005; Maddison et al. 2007). One  
70 core assumption remains throughout all these variants, however: the length of time that a lineage  
has possessed its state does not affect the probability that it will change state. That is, these are all  
72 'memory-less' Markov models. Recent non-Markovian models for lineage diversification allow  
the age of a lineage to influence its probabilities of speciation or extinction (Stadler 2013; Hagen  
74 et al. 2015; Alexander et al. 2016). For trait evolution, however, the only previous non-Markovian  
model is the threshold model (Felsenstein 2005), which we discuss in detail below.

76 Here, we present models that incorporate the dynamic of 'memory' in trait macroevolution.  
We retain the abstract simplicity of representing evolution as jumps between discrete states, but  
78 we add the possibility that these jumps are affected by how long a lineage has held its state.  
First we derive mathematical forms for the memory dynamic from simple assumptions about its

80 underlying cause. Then we investigate whether phylogenetic comparative data can reveal the  
signature of memory in trait macroevolution. We close by discussing how future work could  
82 further open this macroevolutionary idea to empirical study.

## Models

### 84 *Renewal process*

For modeling the evolution of discrete-valued traits on a phylogeny, a continuous-time Markov  
86 chain is by far the most common approach (Felsenstein 1981; Pagel 1994; Lewis 2001). In this  
model, the chance of a change in state depends only on the rate parameters and the current  
88 value of the state. For example, if the trait can take either state  $A$  or  $B$ , the model is described by  
two parameters:  $q_{AB}$  is the instantaneous rate at which a lineage in state  $A$  flips to state  $B$ , and  
90  $q_{BA}$  is the instantaneous rate for the reverse trait flip. (Throughout, we will consider only binary  
traits, so a ‘flip’ is a change to the other state.) The trait flips from state  $A$  to  $B$  follow a Poisson  
92 process in this model, and the waiting time until the next flip has an exponential probability  
distribution with mean  $1/q_{AB}$  (and similarly for flips from  $B$  to  $A$ ).

94 Our goal is to build a model in which the instantaneous rate of a trait flipping depends on  
how long the lineage has held that state. This requires removing the ‘memory-less’ property  
96 of the Markov and Poisson processes, rendering the waiting times no longer exponentially dis-  
tributed. The renewal process is the generalization of the Poisson process to any distribution of  
98 waiting times, provided they are still independent and identically distributed (Ross 2010, Ch. 7).  
Each trait flip constitutes a ‘renewal,’ and the time until the next flip depends on the time since  
100 the last renewal. Our derivations will consider only the symmetric case in which transitions from  
 $A$  to  $B$  have the same distribution as from  $B$  to  $A$ . Future work could relax this assumption by  
102 using an alternating renewal process.

The ‘hazard function’ describes the instantaneous rate of an event occurring. In our context,  
104 this is the chance of a flip occurring at time  $t$  given that the previous flip was at time 0 (fig. 1).  
In terms of the probability density function (PDF) of the waiting times,  $f(t)$ , and its cumulative  
106 distribution function (CDF),  $F(t)$ , the hazard function is  $h(t) = f(t)/[1 - F(t)]$ . For the usual  
Poisson process of trait flips, the hazard function is flat, e.g.,  $h(t) = q_{AB}$ . Under the idea that  
108 extended commitment to one state inhibits evolutionary transitions to another state, we would  
like a trait evolution model with a declining hazard function, so  $h(t)$  decreases with  $t$ . There

110 could perhaps be other situations in which an increasing hazard function is appropriate, and our  
derivations also allow for this. For example, a parasite may be more likely to switch hosts after  
112 enough time has passed that its current host has adapted to reduce its efficacy.

The renewal process in general can operate with any hazard function. What is an appropriate  
114 renewal function for trait evolution? We next describe three models that abstract the process of  
trait evolution with different forms of ‘memory.’ We derive the hazard function for each and then  
116 compare across models.

### *Threshold models*

118 There is currently one phylogenetic model of discrete trait evolution that inherently causes the  
duration in one state to affect the chance of flipping to the other state: the Threshold model  
120 (Felsenstein 2005). This model tracks the evolution of an unobserved continuous-valued quantity  
called the ‘liability.’ The observed discrete-valued trait takes state  $A$  when the liability is below a  
122 certain threshold value and state  $B$  when it is above the threshold (fig. 2A). This model represents  
the situation in which a trait can only take discrete observable states, such as presence or absence,  
124 but a large number of genetic and environmental factors together determine the state (Wright  
1934).

126 It is intuitive that memory is built into the evolution of such a trait. The longer the state has  
remained  $A$ , the farther is the liability expected to have wandered from the threshold, making a  
128 transition to  $B$  less likely. The Threshold model has been used to compute correlations between  
traits (Felsenstein 2005) and to infer ancestral states (Revell 2014). Here we relate the Threshold  
130 model to a renewal process of trait evolution to better understand its memory properties.

The original threshold trait model describes normally-distributed liability values (Wright  
132 1934), and a Brownian motion process was later used for the evolution of the liability (Felsenstein  
2005). The Brownian motion formulation is, however, not suited to our goal of modeling the time  
134 to the next trait flip. If  $t_1$  is the time at which the trait value crosses the threshold into a particular  
state and  $t_2$  is the next time that the trait returns to the threshold and flips back to the previous  
136 state, then for any  $\epsilon > 0$  we have that  $P(t_2 < t_1 + \epsilon) = 1$ . That is, the probability of returning to  
the threshold is one even over a vanishingly small amount of time. Thus, although the Brownian  
138 motion formulation used by Felsenstein (2005) works well for other applications of the Threshold  
model, we need an alternative formulation to compute a meaningful distribution of times until  
140 the next trait flip.

### Random walk model

142 We describe a different model for the liability, which retains the spirit of the Threshold model  
 but avoids the artificial pathological path properties of Brownian motion. Consider a one-  
 144 dimensional random walk in which steps of size one to the left or the right are equally likely,  
 and the waiting time between steps is exponentially distributed with rate  $\theta$ . For convenience, we  
 146 place the threshold at 0.5: the trait thus flips from  $A$  to  $B$  when the liability steps from 0 to 1,  
 vice versa for the other direction, and the liability spends no time directly on the threshold.

We are interested in the probability distribution of  $\tau$ , the amount of time it takes to flip  
 to  $B$  if  $A$  has just been acquired. (It is the same for flips in the reverse direction because our  
 random walk is symmetric, but we pick one case for clarity.) Let  $f_\tau$  and  $F_\tau$  be the PDF and CDF,  
 respectively, of  $\tau$ . Let  $N$  be the number of steps taken by the random walk before hitting 1 for  
 the first time, starting from 0; this is the number of steps between threshold crossings. Then for  
 positive integers  $i$ , the probability mass function of  $N$  is given by (Lalley 2016)

$$P(N = i) = 2^{1-i}(i + 1)^{-1} \binom{i-2}{\frac{i-1}{2}}, \text{ if } i \text{ is odd,}$$

148 and  $P(N = i) = 0$  for all even values of  $i$  due to the parity of the random walk.

The times between steps of our random walk are exponentially distributed with rate  $\theta$ , so  
 the time  $\tau$  can be interpreted as a sum of  $N$  independent exponential random variables each  
 with rate  $\theta$ , where  $N$  is itself a random variable. The sum of independent identical exponential  
 random variables has a Gamma distribution (Ross 2010, Ch. 5). Therefore, conditioned on  $N$   
 taking some particular value  $i$ , the distribution of time to the next flip is  $\tau = Y_i$  where  $Y_i$  is a  
 Gamma random variable with shape parameter  $i$  and rate parameter  $\theta$ . Allowing for all possible  
 values of  $N$ , we can then write the PDF or CDF of  $\tau$  as a mixture of PDFs or CDFs of the  $Y_i$ , for  
 $i = 1, 2, \dots$ . The hazard function of  $\tau$  thus becomes

$$h_\tau(x) = \frac{f_\tau(x)}{1 - F_\tau(x)} = \frac{\sum_{i=1}^{\infty} f_{Y_i}(x)P(N = i)}{1 - \sum_{i=1}^{\infty} F_{Y_i}(x)P(N = i)}. \quad (1)$$

The hazard function for the symmetric random walk Threshold model (eq. [1]) is illustrated in  
 150 figure 3A. The rate of flips to state  $B$  always decreases with time spent in  $A$ . The steepness of that  
 decrease is determined by the distribution of times between steps. With larger values of  $\theta$ , the  
 152 time between steps is smaller, so the liability quickly wanders farther from the threshold and a

flip to the other state rapidly becomes less likely. When the time spent in  $A$  is longer, the random  
154 walk is more likely to have already wandered far from its starting point, so waiting additional  
time does not significantly affect the rate of flipping to  $B$ . In this regime, the dependence on  $\theta$   
156 also decreases due to the following compensatory mechanism: for fixed time, larger values of  
 $\theta$  result in the walk being farther from the threshold, requiring more steps to return taken at a  
158 faster rate, while smaller values of  $\theta$  are associated with the walk being closer to the threshold,  
requiring fewer steps to return but taken at a slower rate.

### 160 *Multi-state models*

Another way to conceptualize a process that produces memory in trait evolution is an accumu-  
162 lation of changes in other traits ('subtraits') that support the focal trait. For example, if the focal  
trait is diet type, a species may become increasingly more adapted to eating insects as it acquires  
164 the behavioral, morphological, and physiological attributes that allow it to find, catch, and digest  
that type of prey. Alternatively, the subtraits could represent accumulated losses of function in  
166 genes that are no longer under selection, such as functional eyes or pigmentation once a species  
becomes cave-dwelling. Even if it would be possible to observe these subtraits, perhaps not all  
168 have been identified or included in a dataset focused on the main trait of interest. We will there-  
fore assume that only the focal trait, with values  $A$  or  $B$ , is observed, and not the values of the  
170 subtraits (called  $A_i$  and  $B_i$  for  $i = 0, 1, \dots$ ).

Structured multi-state Markov models have previously been used to describe the macroevo-  
172 lution of subtraits within focal traits. For example, Zenil-Ferguson et al. (2017) considered tran-  
sitions between two states, herbaceous and woody, while simultaneously modeling changes in  
174 chromosome number within each state. All the modeled states are observable in this case, be-  
cause they are combinations of growth form and chromosome number. In contrast, Beaulieu and  
176 O'Meara (2016) add a hidden state to a model of binary trait evolution, so that each observed  
state is represented as two hidden substates between which transitions are possible. Applying  
178 this model to plant breeding systems, Freyman and Höhna (in review) found the hidden state to  
represent a memory process: lineages evolved from  $A$  to one hidden state of  $B$  and then to the  
180 other hidden state of  $B$ . (The hidden states were indistinguishable phenotypically, but they had  
different effects on lineage diversification.) Tarasov (in review) describes other arrangements of  
182 multi-state Markov models for the evolution of traits with hidden or hierarchical aspects.

We next describe two multi-state models explicitly structured to represent memory in trait



184 evolution (fig. 2BC). In each, we assume that as time passes, a lineage evolves through a sequence  
of substates that underly the focal trait. In the examples mentioned above, this could represent  
186 increasing adaptation to an insectivore diet or increasing loss of function within a cave environ-  
ment. Both of our multi-state models exhibit memory when the rate of flipping to the other focal  
188 state depends on the current substate. The two models differ in the effect that a flip in the focal  
trait has on the value of the subtrait. In the Reset model (fig. 2B), the subtrait value that accumu-  
190 lated in the previous focal state is reset because it is irrelevant when that focal trait changes. For  
example, progression through insectivore subtraits might involve gradually gaining the ability  
192 to distinguish palatable from noxious insect prey, but this subtrait may have no cost or benefit  
when the predominant food changes to seeds. In the Retain model (fig. 2C), the subtrait value  
194 that accumulated in the previous focal state is retained and thus has an immediate effect when  
the focal trait changes. For example, progression through cave subtraits might involve gradually  
196 losing functional eyes, and that reduced vision would still be present in a lineage that just tran-  
sitioned to surface habitat. We explain each model further below, but in essence the distinction  
198 is whether increased entrenchment in one focal state is undone immediately or gradually upon  
transition to the other state. Real traits might exhibit some mix of these two dynamics, but it is  
200 informative to consider their separate effects. For each model, we derive their hazard functions  
in order to compare their memory properties.

#### 202 *Reset model*

We first consider the case where a flip to the other observed state causes the unobserved subtrait  
204 to ‘reset’ its values. Consider a small example with three subtraits (fig. 2B; though our derivation  
can easily be generalized to more subtraits). Suppose that progressive commitment to  $A$  is rep-  
206 resented as transitions from  $A_0$  to  $A_1$  to  $A_2$ , each taking place after an exponentially-distributed  
waiting time with rate  $\rho$ . From any of these substates  $A_i$ , the species may transition to the first  
208 substate of the other observed state,  $B_0$ . We assume that these flips also have exponential waiting  
times, but with rates  $\eta_i$  that depend on the initial substate,  $i = 0, 1, 2$ . Thus, when  $\eta_0 > \eta_1 > \eta_2$ ,  
210 lineages that have progressed to later substates ( $A_i$  for larger  $i$ ) are less likely to flip to state  $B$ .  
Our goal is to determine the distribution of  $\tau$ , the time it takes to flip to  $B$  after entering  $A$ . In  
212 this Reset model,  $\tau$  describes the time to enter  $B_0$  after having just arrived in  $A_0$ . (Our symmetry  
assumptions ensure the answer is the same for flips from  $B$  to  $A$ .)

To derive the distribution of  $\tau$ , we consider all the possible paths a lineage could take from

$A_0$  to  $B_0$ . For three substates, these are:  $A_0 \rightarrow B_0$ ,  $A_0 \rightarrow A_1 \rightarrow B_0$ , and  $A_0 \rightarrow A_1 \rightarrow A_2 \rightarrow B_0$ . Define the random variable  $Y$  as the substate of  $A$  just before the flip to  $B$ . For the three paths above,  $Y = 0, 1$ , or  $2$ , respectively. In addition, define independent random variables for the transition time to the next substate,  $Z_i \sim \exp(\rho)$  (for  $i = 1, 2$ ), and for the next flip to the other state,  $Q_i \sim \exp(\eta_i)$  (for  $i = 0, 1, 2$ ). Then we can rewrite  $\tau$  in terms of these random variables, conditioned on  $Y$ :

$$\tau \sim \begin{cases} Q_0 & \text{if } Y = 0 \\ Z_1 + Q_1 & \text{if } Y = 1 \\ Z_1 + Z_2 + Q_2 & \text{if } Y = 2. \end{cases}$$

We next define random variables representing renewal times for each of the possible paths:  $D_0 \equiv Q_0$ ,  $D_1 \equiv Z_1 + Q_1$ ,  $D_2 \equiv Z_1 + Z_2 + Q_2$ . Then we obtain the PDF and CDF of each  $D_i$ :

$$\begin{aligned} f_{D_0}(x) &= \eta_0 e^{-\eta_0 x} \\ F_{D_0}(x) &= 1 - e^{-\eta_0 x} \\ f_{D_1}(x) &= \frac{\eta_1 \rho}{\eta_1 - \rho} (e^{-\rho x} - e^{-\eta_1 x}) \\ F_{D_1}(x) &= 1 - \frac{\rho}{\rho - \eta_1} e^{-\eta_1 x} + \frac{\eta_1}{\rho - \eta_1} e^{-\rho x} \\ f_{D_2}(x) &= \frac{e^{-\rho x} \eta_2 \rho^2}{C^2} (Cx - e^{-Cx} - 1) \quad [\text{defining } C = \eta_2 - \rho] \\ F_{D_2}(x) &= \frac{\eta_2}{C} (1 - e^{-\rho x} (\rho x + 1)) - \frac{\rho^2}{C^2} (1 - e^{-\eta_2 x}) + \frac{\eta_2 \rho}{C^2} (e^{-\rho x} - 1) \end{aligned}$$

214 provided  $\eta_1 \neq \rho$ ; otherwise  $D_1$  is distributed as a Gamma random variable with shape 2 and rate  $\rho$ .

In addition to the above expressions for the renewal time along each possible path, we need to know how likely it is to take each path. The conditioning probabilities are the probabilities of each path from  $A_0$  to  $B_0$ , i.e., the probabilities that  $Y = i$ :

$$\begin{aligned} P(Y = 0) &= P(Q_0 < Z_1) = \frac{\eta_0}{\eta_0 + \rho} \\ P(Y = 1) &= P(Q_0 > Z_1, Q_1 < Z_2) = \frac{\rho}{\eta_0 + \rho} \frac{\eta_1}{\eta_1 + \rho} \\ P(Y = 2) &= \frac{\rho}{\eta_0 + \rho} \frac{\rho}{\eta_1 + \rho}. \end{aligned}$$

The PDF and CDF of  $\tau$  are then obtained as the distributions for each possible path weighted by the probability of taking that path,

$$f_{\tau}(x) = P(Y = 0)f_{D_0}(x) + P(Y = 1)f_{D_1}(x) + P(Y = 2)f_{D_2}(x) \quad (2a)$$

$$F_{\tau}(x) = P(Y = 0)F_{D_0}(x) + P(Y = 1)F_{D_1}(x) + P(Y = 2)F_{D_2}(x), \quad (2b)$$

from which we obtain the hazard function,

$$h_{\tau}(x) = f_{\tau}(x)/[1 - F_{\tau}(x)]. \quad (2c)$$

216

Examples of the hazard function for the Retain model (eq. [2]) are illustrated in figure 3B. A variety of hazard function shapes are possible even when it is increasingly hard to leave subsequent substates ( $\eta_0 > \eta_1 > \eta_2$ ). When no time has passed in  $A$ , the rate of flipping to  $B$  is always  $\eta_0/(\eta_0 + \rho)$ , which is the probability of transitioning to  $B$  rather than to  $A_1$ . When a long time has passed in  $A$ , the rate of flipping to  $B$  is always  $\eta_2$  because there is no other option for a transition out of  $A_2$  (in this example with only three subtraits). For intermediate durations in  $A$ , the shape is determined by the weighted contributions of each possible path to  $B$ . This allows for hazard functions that are not monotonically decreasing. This may be surprising at first, but recall that the duration in  $A$  is influenced not only by the time to transition from  $A_0$  to  $A_1$  and so on, but also by the time to flip to  $B$ , and the combined effect may not be entirely intuitively obvious. For example, an initial increase in the hazard function results if the rate of progressing within the current observed state (from  $A_0$  to  $A_1$ , with rate  $\rho$ ) is higher than the rate of flipping to the other observed state (from  $A_0$  to  $B_0$ , with rate  $\eta_0$ ), because the dynamics can be initially drawn into a longer overall path from  $A$  to  $B$  by first taking a step to  $A_1$ .

### *Retain model*

We next consider the case where a species ‘retains’ the value of its subtrait when flipping to the other observed state. In contrast to the Threshold and Reset conceptualizations of memory in trait evolution, this Retain model cannot be described by a two-state renewal process. Instead, a different renewal process is needed for each substate. To see this, consider again the example with three subtrait values (fig. 2C). As before, transitions to successive substates ( $A_i \rightarrow A_{i+1}$ )

take place after an exponential waiting time with rate  $\rho$ . In contrast to the Reset model, in the  
 238 Retain model  $A_i$  transitions to  $B_i$  instead of to  $B_0$  for  $i = 0, 1, 2$ , so the lineage retains the  $A$ -  
 adapted subtraits even after the transition to  $B$ . Again, these flips from  $A_i$  to  $B_i$  take place after  
 240 an exponential amount of time with rate  $\eta_i$ , and  $\eta_0 > \eta_1 > \eta_2$  if flips to  $B$  become increasingly  
 difficult with greater commitment to  $A$ . (Because subtrait evolution while in  $B$  undoes changes  
 242 accrued while in  $A$ , we might wish to label and order the rates  $\eta_i$  differently for flips from  $B$  to  
 $A$ , as indicated by the gray arrows in fig. 2C.)

In the Retain model, let  $\tau_i$  be the the time it takes to flip to  $B$ , starting from state  $A_i$ . For the  
 starting state of  $A_0$ ,  $\tau_0$  has the same distribution as the renewal time in the Reset model (eq. [2]).  
 However,  $\tau_1$  has a different distribution. Recall the random variable  $Y$  which tracks the substate  
 at the time of the trait flip. When the initial state is  $A_1$ ,  $Y$  can only take values 1 or 2, so  $\tau_1$  can  
 be written as

$$\tau_1 \sim \begin{cases} Q_1 & \text{if } Y = 1 \\ Z_2 + Q_2 & \text{if } Y = 2 \end{cases}$$

with conditioning probabilities

$$P(Y = 1) = P(Q_1 < Z_2) = \frac{\eta_1}{\eta_1 + \rho}$$

$$P(Y = 2) = P(Q_1 > Z_2) = \frac{\rho}{\eta_1 + \rho}.$$

Then we have the PDF and CDF of  $\tau_1$ :

$$f_{\tau_1}(x) = P(Y = 1)\eta_1 e^{-\eta_1 x} + P(Y = 2)\frac{\eta_2 \rho}{\eta_2 - \rho}(e^{-\rho x} - e^{-\eta_2 x})$$

$$F_{\tau_1}(x) = P(Y = 1)(1 - e^{-\eta_1 x}) + P(Y = 2)\left(1 - \frac{\rho}{\rho - \eta_2}e^{-\eta_2 x} + \frac{\eta_2}{\rho - \eta_2}e^{-\rho x}\right).$$

244 Lastly,  $\tau_2$  is simply an exponential random variable with rate  $\eta_2$ , with the corresponding constant  
 hazard function.

246 Because the renewal time for flips from  $A$  to  $B$  depends on the substate held upon arrival  
 into  $A$ , the renewal process must be modified to explicitly account for all the substates. A two-  
 248 state renewal process will not suffice. There is thus no single hazard function that describes flips  
 between  $A$  and  $B$  in the Retain model. For example, in figure 4 we see that the hazard functions

250 for arrival in  $A_0$  match those of the Reset model with the same parameters (comparing fig. 4A  
with fig. 3B), but that for those same parameters, the hazard functions for arrival in  $A_1$  and  $A_2$   
252 are different. Similar to the Reset model, as the duration in  $A$  increases, it becomes more likely  
that the flip to  $B$  will occur from the last substate,  $A_2$ , so the hazard rates all approach  $\eta_2$ .

### 254 *Choice of renewal function*

All three models considered above contain the idea that changes in many unobserved compo-  
256 nents accumulate to inhibit changes in the focal binary trait. Each model represents this process  
differently, however, and we found that the effect is not always the same. The most consistent  
258 outcome is a hazard function that declines steeply at first and then more gradually, so that the  
effect of memory on trait evolution is strongest shortly after a trait change. This is true always  
260 for the Threshold model, but only sometimes for the Reset and Retain models. In these latter  
models, even if the rate of flipping from  $A$  to  $B$  declines as subtrait changes accumulate, the haz-  
262 ard function itself need not be strictly decreasing. The Reset model could be fit to phylogenetic  
data with existing multi-state Markov methods. If this is done, however, our results show that  
264 finding  $\eta_i > \eta_{i+1}$  (for  $i = 0, 1, \dots$ ) would be insufficient to conclude that the rate of flips to the  
other state simply declines with duration in the state.

266 The above models provide a sense of what a hazard function should look like to be consistent  
with some abstract mechanisms for how memory may enter trait evolution. Rather than model  
268 such mechanisms, however, one could instead work simply with a two-state renewal process  
and directly specify the mathematical form of the renewal function. This approach would not  
270 capture the Retain model, as explained above. However, choosing, say, a Gamma distribution for  
the renewal function would roughly capture the shape of the hazard seen under the Threshold  
272 model and many cases of the Reset model. It also includes as a special case the Poisson model  
with exponentially-distributed waiting times. Examples are shown in figure 1. We take this  
274 approach of directly specifying the renewal function in the next section, when we turn to fitting  
the renewal process to data.

### 276 **Inference**

We now consider the question of whether memory in trait evolution can be inferred from phy-  
278 logenetic comparative data. First, we derive the likelihood of tip character states given the tree

and a renewal model of trait evolution. Then, we present a small set of simulation results to test  
 280 the efficacy of this approach. That is, we investigate whether a Poisson process can be distin-  
 guished from a more general renewal process for trait evolution based on commonly-available  
 282 phylogenetic data.

### *Likelihood*

284 To calculate the likelihood of observed tip states on a phylogeny, we employ the pruning algo-  
 rithm (Felsenstein 1981). Working from the tips of the tree toward the root, this algorithm com-  
 286 bines the probabilities of state changes along each branch while summing over possible states  
 at each node. For any model using this algorithm, the key quantity is the transition probability  
 288 function. Given that a lineage is in state  $s_0$  at time  $t$ , the transition probability  $P_{s_0, s_1}(t, t + v)$  is the  
 probability that the lineage is in state  $s_1$  at time  $t + v$ . We next derive this transition probability  
 290 for the renewal model.

Our derivation assumes that there are two possible states, and that transitions between them  
 292 are governed by the same renewal process in each direction. We further assume that we specify  
 directly the renewal function, with PDF  $f$  and CDF  $F$ .

To begin, suppose a renewal occurs right at time  $t$ , creating state  $s_0$  (fig. 5A). The probability  
 of ending up in state  $s_1$  at  $v$  units of time later is

$$\zeta_{s_0, s_1}(v) \equiv \begin{cases} \sum_{i=0}^{\infty} F_{2i}(v) - F_{2i+1}(v) & \text{when } s_1 = s_0 \\ \sum_{i=0}^{\infty} F_{2i+1}(v) - F_{2i+2}(v) & \text{when } s_1 \neq s_0. \end{cases} \quad (3)$$

294 The first case describes an even number of flips during that time, and the second case describes  
 an odd number of flips. The following property of the renewal process is used in equation (3):  
 296 If a renewal occurs at time 0, let  $N(t)$  be the number of renewals until time  $t$ . Then  $P(N(t) =$   
 $n) = F_n(t) - F_{n+1}(t)$ , where  $F_n(t)$  is the CDF for the sum of  $n$  independent copies of the renewal  
 298 process (Ross 2010, eq. 7.3). That is,  $F_n(t)$  is the probability that  $n$  or more renewals have occurred  
 by time  $t$ , and it is the  $n$ -fold convolution of  $F$  with itself. (Note that this convolution is trivial  
 300 for the Gamma distribution, which is another reason we suggested above that it could be used  
 as the renewal function.)

However, it is in general not the case that a renewal occurs right at time  $t$ . Let  $\tau$  be the amount  
 of time elapsed from  $t$  to the next renewal; this is the residual time (fig. 5B). The PDF of  $\tau$  is given

by

$$f_{\tau}(x, t) = f(t + x) + \int_0^t f(u + x)m'(t - u)du, \quad (4)$$

302 where  $m(t) = \mathbb{E}[N(t)]$  is the expected value, and  $m'(t) = dm/dt$  is the probability that there was  
a renewal between times  $t$  and  $t + dt$ . In equation (4), the first term applies when no renewal has  
304 happened at all (since time 0), and the second term applies when there was a previous renewal  
(at time  $t - u$ ). This second term integrates over all times that previous renewal could have  
306 happened, weighting each by the probability of a renewal then.

If we assume that the trait evolution process is in the limiting regime, we can simplify equation (4):

$$\lim_{t \rightarrow \infty} f_{\tau}(x, t) \rightarrow \frac{1 - F(x)}{\mu} \equiv f_{\tau}(x), \quad (5)$$

where  $\mu$  is the mean of the distribution  $F$ . Under this limit, the first term in equation (4) goes to  
308 zero because at least one renewal would have happened by  $t$ . Also, the density of renewal events,  
 $m'(t)$ , goes to its mean value of  $1/\mu$ , the reciprocal of the mean time between renewals. Thus, we  
310 have dropped the dependence on the absolute time  $t$ , so that  $f_{\tau}$  can be interpreted as the amount  
of time we wait until the next renewal, regardless of the current time. In the following we will  
312 retain the assumption that we are concerned only with the limiting regime  $t \rightarrow \infty$ , which means  
assuming that the trait evolution process has run for a long time before the root of the tree.

We now construct the transition probabilities. One possibility is that the first renewal after  
time  $t$  occurs before or at time  $t + v$  (fig. 5B). In this case, we must also consider subsequent  
renewals that may or may not occur by  $t + v$ . Then, the probability of observing state  $s_1$  at time  
 $t + v$ , conditioned on knowing  $s_0$  at time  $t$ , is given by:

$$P_{s_0, s_1}(v | \tau \leq v) = \frac{1}{F_{\tau}(v)} \int_0^v \zeta_{s_0^!, s_1}(v - r) f_{\tau}(r) dr. \quad (6a)$$

314 The notation  $s_i^!$  means the state that is not  $s_i$ , and  $F_{\tau}$  is the CDF of  $\tau$ . We have dropped the  
 $t$  dependence from the above equation based on the limiting approximation of the PDF of  $\tau$   
316 (eq. [5]).

The other possibility is that the first renewal after time  $t$  happens after time  $t + v$ . Then,

$$P_{s_0, s_1}(v | \tau > v) = \delta_{s_0, s_1}, \quad (6b)$$

where the Kronecker  $\delta$  function is 1 if the states are equal and 0 otherwise.

Putting these two possibilities (eq. [6]) together, the probability of observing state  $s_1$  at  $v$  units of time after observing  $s_0$  is given by:

$$\begin{aligned} P_{s_0, s_1}(v) &= P_{s_0, s_1}(v | \tau \leq v)P(\tau \leq v) + P_{s_0, s_1}(v | \tau > v)P(\tau > v) \\ &= \int_0^v \zeta_{s_0, s_1}^{\dagger}(v-r) f_{\tau}(r) dr + [1 - F_{\tau}(v)] \delta_{s_0, s_1}. \end{aligned} \quad (7)$$

318 Armed with the transition probability function for our renewal model (eq. [7]), we can use the  
pruning algorithm to compute the likelihood of the tip state data given the tree and the model,  
320 conditional on the state at the root (Felsenstein 1981). Because we have assumed that transitions  
between the states are symmetric, and that the trait evolution process has been running for a  
322 long time before the root, each root state is equally probable. The full likelihood is thus the sum  
of the conditional likelihoods with weight one-half each.

### 324 *Simulation tests*

In principle, the likelihood function derived in the previous section could be used to infer the  
326 parameters of the two-state symmetric renewal process model from phylogenetic data. To test  
how well this might work in practice, we implemented the likelihood calculation and used it for  
328 parameter estimation on simulated data. The limited results we report here give a rough sense  
of the feasibility of identifying memory in trait evolution from phylogenetic data, though they  
330 are by no means a comprehensive assessment.

For our inference model, we chose a Gamma distribution for the renewal function. The central  
332 inference question is thus whether the ‘shape’ parameter of this distribution is distinguishable  
from 1. If not, a Poisson model is sufficient to explain the data, and there is no evidence for  
334 memory in the macroevolution of the trait (fig. 1i). If  $0 < \text{shape} < 1$ , memory works in the ex-  
pected direction, with flips in the trait becoming more difficult the longer a state is held (fig. 1ii).  
336 If instead  $\text{shape} > 1$ , memory works in the opposite direction, with flips in the trait becoming  
increasingly likely (fig. 1iii).

338 In our testing procedure, we first simulated a large phylogeny under a simple birth-death  
model (500 tips, speciation rate  $10\times$  larger than extinction rate, tree scaled to a root age of  
340 1). Then we simulated the evolution of a trait under the renewal process on that tree, using  
Gamma-distributed waiting times for flips of the binary trait. Our simulations and inference all  
342 assume symmetric trait evolution, with flips from  $A$  to  $B$  governed by the same distribution as



flips from  $B$  to  $A$ . We then computed the likelihood of the tip state data on the tree using the  
344 likelihood function derived above, again with a Gamma distribution for the renewal function.  
We used Bayesian inference to estimate the shape and rate parameters of each simulation of trait  
346 evolution. We fit the model with Markov chain Monte Carlo (MCMC) using a slice sampler (Neal  
2003). We assigned a prior on each parameter that was exponential with rate  $-\ln(1/2) = 0.693$ ,  
348 which gives equal weight to shape parameters less than or greater than 1 over the age of the  
tree, and which is also relatively uninformative over reasonable values of the rate parameter. To  
350 visualize how the data provide information about the shape and rate parameters, we additionally  
computed the likelihood on gridded parameter space. This also serves as a check that maximum  
352 likelihood parameter estimates are in general agreement with those from Bayesian inference. Our  
C and R code for all these procedures is included as Supplementary Material.

354 Our primary inference question is whether typical phylogenetic comparative data—a ‘known’  
tree and trait values for extant species—bear any signal of memory in the evolution of the trait.  
356 We find that in many cases they do. Datasets simulated with a declining hazard function—so  
that trait flips become less likely with longer duration in a state—yielded estimates of the shape  
358 parameter that were consistently close to the true value and less than 1, though the estimates  
were not always precise enough to exclude 1 (fig. 6, top row). Datasets simulated with flat or  
360 increasing hazard functions yielded larger shape estimates, but these usually did not rule out a  
shape value of 1 with any confidence (fig. 6, middle and bottom rows). The hazard functions and  
362 rate parameter estimates are shown in figures S1–S2.

Estimates were less accurate and less precise when the true rate parameter was low (fig. 6, left  
364 columns). With a low rate, flips are rarer overall so less of the total branch length on the tree lies  
shortly after a trait flip. Because the hazard function changes most rapidly shortly after a trait  
366 flip, lower rates provide less potential to see the influence of trait duration on the instantaneous  
rate of change. Accuracy also appears to be worse for shape parameters larger than 1. Again, the  
368 distinguishing portion of time is shortly after a flip, but this is when the rate is low (fig. 2iii) so  
there are few events to inform the value of the instantaneous rate.

370 Visualizing the likelihood function reveals that much uncertainty comes from parameter cor-  
relations (fig. S3). There is a ridge in the likelihood surface such that the data are explained  
372 almost equally well by large shape and rate values, or by small shape and rate values. One  
explanation may be that the main distinguishable signal is of merely the average time between  
374 renewals, which is governed by the ratio between shape and rate parameters for the Gamma

distribution choice of renewal times. For example, the three hazard functions shown in figure 1  
376 have positively correlated parameters [shape and rate both low for (ii), both high for (iii), both  
intermediate for (i)] and roughly the same average value over the time interval shown. Fixing  
378 the rate parameter to the true value sidesteps the correlation and yields greatly improved esti-  
mates of the shape parameter (consider a horizontal transect in fig. S3), but this type of extra  
380 information may be difficult to obtain for real-world applications.

In summary, the Threshold, Reset, and Retain models discussed earlier provide some general  
382 guidance on the form the renewal function would take under various assumptions of the cause of  
memory in trait evolution. Based on that guidance, we chose one functional form for the renewal  
384 function, simulated trait evolution under it, and tested whether those simulated phylogenetic  
data revealed whether the true hazard function was flat, decreasing, or increasing. We found  
386 that phylogenetic comparative data do bear some signal of the shape of the hazard function,  
though precision and accuracy are not especially great. Thus, for future empirical studies, it may  
388 be possible to estimate the strength of memory in trait macroevolution, but further work would  
be needed, as discussed below.

390

## Discussion

Here we have considered whether trait evolution on long timescales might not be ‘memory-less,’  
392 such that the longer a lineage has held a trait value, the harder it is for that value to change. Our  
goal was to describe a new macroevolutionary model of trait evolution that incorporates sufficient  
394 complexity to open up the study of this question, while retaining sufficient simplicity that it can  
represent evolution on many different lineages and be fit to phylogenetic data. We compared  
396 different mathematical models that incorporate memory in trait evolution, and we showed how  
a fairly general model can be fit to a phylogeny. We found that phylogenetic comparative data  
398 can in principle bear the signature of trait evolution memory, but that in practice there may be  
substantial uncertainty in the inference of this process. We end by discussing how future work  
400 might build on our approach by extending the mathematics employed, the data provided, and  
the questions posed.

### 402 *Extending the mathematical framework*

403 Enhancing the mathematical models described above would open new possibilities for modeling  
404 memory in trait evolution. In some applications, the substates of the Reset or Retain model might  
represent known subtraits or genetic changes. If this knowledge provided more specific guidance  
406 on the difficulty of moving between substates, the transitions could be adjusted accordingly (e.g.,  
replacing  $\rho$  with  $\rho_i$ , or using a non-Poisson process). The allowed transitions could also be  
408 altered, to provide, for example, a mix of the Reset and Retain dynamics.

In many applications, trait evolution is expected to proceed differently in one direction than  
410 another. All of our models could be extended to accommodate this change. For the Reset and  
Retain models, asymmetric flips in the focal trait could be introduced by adding parameters  
412 (replacing  $\eta_i$  with  $\eta_{Ai}$  and  $\eta_{Bi}$ ). For the Threshold model, an asymmetric random walk could be  
used. For inference with a directly-chosen renewal function, the likelihood calculation could be  
414 expanded to allow an alternating renewal process.

To infer from data whether there is memory in trait macroevolution, the key inference goal  
416 is the value of the parameter that governs the presence of memory. In our simulation tests,  
this was the shape parameter of the Gamma distribution, but we found that its estimation was  
418 confounded with the rate parameter. To avoid this problem of parameter correlations, it might  
be possible to choose a different renewal distribution in which only one parameter governs the  
420 mean. Another reason to implement other functions for the renewal process is to capture hazard  
functions that represent different mechanisms of trait evolution. Such an extension would not  
422 require a change to the likelihood derivation, but it would require changes to the software imple-  
mentation. In particular, the choice of Gamma distributed renewal times is convenient because  
424 its  $n$ -fold convolution, which we used in the likelihood calculation, follows a simple parametric  
form. A compound Poisson distribution, for example, would also possess this property. Other-  
426 wise, it may be possible to use more general classes of distributions if the  $n$ -fold convolution is  
precomputed numerically and stored for likelihood computations.

428 The threshold model is already in use, but its current phylogenetic applications are compu-  
tationally difficult because they integrate over all the possible values of the liability at each node  
430 and tip (Felsenstein 2005; Revell 2014; Hiscott et al. 2016). Our approach is different: we work  
directly with the transition probabilities for the observed binary trait, not with the unobserved  
432 liabilities. Therefore, using our likelihood function with the hazard function of the threshold

model, which we also computed, might provide a more efficient means of fitting the threshold  
434 model to phylogenetic data.

### *Extending the data in phylogenetic comparative analyses*

436 The simulation tests we reported are a first indication of whether one could hope to infer the  
presence of memory in trait macroevolution from typical phylogenetic comparative data. We  
438 find that there is indeed some signal, but that precision and accuracy may not be high. One tack  
for improving inference of the renewal process is to consider how other sources of information  
440 could be incorporated into an analysis.

Other studies have demonstrated that combining fossil information with phylogenetic anal-  
442 yses can aid inference of trait evolution (Finarelli and Flynn 2006; Slater et al. 2012; Hunt 2013;  
Slater 2013). We thus tested briefly whether additional information about past states might im-  
444 prove inference of the renewal process parameters. As an optimistic scenario, we considered the  
case where all species on a simulated birth-death tree are retained, whether or not they survive  
446 to the present, along with their terminal trait values. We found that on a tree with half extant  
tips and half extinct tips, parameter estimates were better than when the same tree was pruned  
448 to only extant tips, and that estimates were comparable to those on a different tree with the  
same total number of tips, all extant. (Detailed results are not shown. But more specifically, we  
450 increased the extinction rate to half the speciation rate to obtain a simulated tree with 250 extant  
tips and 247 extinct tips. Then we simulated the binary trait on this tree with  $\text{shape} = 0.25$  or  $1.75$   
452 and  $\text{rate} = 3$  and used all 497 taxa for inference. We compared this to inference on the same  
tree pruned to the 250 extant tips, and to our main results for the same parameter values on a  
454 tree with 500 extant tips.) Thus, our brief tests indicate that fossil data do help by increasing the  
number of species with known state, but that the insight of extinct tips into past states does not  
456 seem to provide a particular benefit.

Besides tips representing extinct species, other kinds of historical information can anchor  
458 trait values along the branches of the tree. In the ideal case, knowing the trait values along every  
lineage would pinpoint the times of every trait flip and provide complete information about  
460 the renewal process. A useful next step would be to investigate whether a reasonable subset of  
this information on ancestral trait values could greatly improve inference of the renewal process.  
462 Even if the past trait values of a lineage cannot be precisely dated, knowing the number of trait  
changes over a window of time could also be helpful. Other work on renewal processes with

464 Gamma interarrival times shows that data on the number of renewals within the time period of  
observation can aid parameter inference (Miller and Bhat 1997).

466 Even for clades with no fossil record, other kinds of information can hint at past trait values.  
For example, the relative degree of degeneration in underlying genes might indicate that some  
468 lineages have lost, say, functional eyes or blue flowers more recently than others (Niemi et al.  
2013; Wessinger and Rausher 2015). Such an indication of how long a lineage has held its current  
470 value of the focal trait could be incorporated by refining the binary tip state coding to the substate  
level in the Reset or Retain models, or perhaps by placing priors on transition times. This could  
472 potentially improve inference of the renewal process.

### *Extending questions about memory in trait evolution*

474 Our focus has been on the mathematical form and phylogenetical signal of memory in trait  
evolution. The models presented here may, however, also be useful in other settings.

476 One question in molecular evolution is whether the rate of sequence evolution depends on  
the state of an ecological or morphological trait (Mayrose and Otto 2011; Levy Karin et al. 2017).  
478 A renewal model could extend this question to whether the rate of sequence evolution increases  
after a change in the organismal trait, perhaps reflecting adaptation that is most rapid initially.  
480 For example, one could use standard Poisson models for the organismal-level trait and for se-  
quence evolution, but additionally with the overall rate of base pair change following a renewal  
482 process, based on the time since the last organismal trait flip. Such an application is likely to  
derive much more power from the many sites in a sequence: each site evolves under the same  
484 model, and all have the same rate at a given time.

The memory model of trait evolution could also be coupled with models of lineage diver-  
486 sification. For example, increasing inability to adapt to a shift in selective regime could result  
in duration-dependent extinction. This resembles the model of Alexander et al. (2016), but the  
488 critical factor is time since the last trait change rather than time since the lineage's origination.  
An implementation would involve replacing transition probabilities with differential equations  
490 for clade and extinction probabilities (as in Maddison et al. 2007).

An initial motivation in developing the renewal model of trait evolution was that it might  
492 alleviate problems of phylogenetic pseudoreplication in studying trait evolution. For testing  
correlations between two discrete-valued traits, or between one trait and lineage diversification  
494 rates, existing methods draw 'signal' from all parts of the tree that exhibit the correlation, instead

of from the number of independent times that association has arisen (Maddison and FitzJohn  
496 2015; Rabosky and Goldberg 2015). Perhaps a trait evolution model in which the time since the  
last change plays an important role would be less susceptible to this problem.

498 Finally, we will be curious to see if this approach to modeling trait evolution has utility in  
other areas of ecology and evolution. For example, consider a theoretical investigation of when  
500 competitors can coexist on resources that change with time. A renewal process could capture the  
idea that the longer one participant has specialized on a single resource, the harder it is to switch  
502 to another. The coexistence dynamics of such a model might differ from formulations with other  
inhibitions to resource switching.

### 504 *Conclusion*

Our premise has been that the longer a lineage holds a trait value, the harder may become  
506 evolution away from that value. This is, however, only a hypothesis. Evolution does indeed take  
time, but whether the ‘memory’ dynamic of trait evolution emerges at a macroevolutionary scale  
508 depends on how elapsed time relates to extent of fit with the environment, and the degree to  
which increased fit to one regime inhibits evolution in a new direction. We hope that the present  
510 work will enable broad comparative tests that complement system-specific investigations of these  
questions.

### 512 *Acknowledgements*

We are grateful to Maria Servedio for organizing the symposium and imposing deadlines that  
514 enforced progress on this project. We thank members of the UMN EEB ‘Theory under construc-  
tion’ group for their comments in the early stages. Tanjona Ramiadantsoa implemented early  
516 simulations of the renewal process. Will Freyman suggested testing inference with fossil tips  
and applying the renewal model to molecular sequence evolution. This work was supported by  
518 National Science Foundation grants DEB-1655478 to EEG and DMS-1349724 to JF.

### *Literature Cited*

520 Alexander, H. K., A. Lambert, and T. Stadler. 2016. Quantifying age-dependent extinction from  
species phylogenies. *Systematic Biology* 65:35–50.

- 522 Beaulieu, J. M., and B. C. O'Meara. 2016. Detecting hidden diversification shifts in models of  
trait-dependent speciation and extinction. *Systematic Biology* 65:583–601.
- 524 Beaulieu, J. M., B. C. O'Meara, and M. J. Donoghue. 2013. Identifying hidden rate changes in  
the evolution of a binary morphological character: the evolution of plant habit in campanulid  
526 angiosperms. *Systematic Biology* 62:725–737.
- Bokma, F. 2008. Detection of “punctuated equilibrium” by Bayesian estimation of speciation and  
528 extinction rates, ancestral character states, and rates of anagenetic and cladogenetic evolution  
on a molecular phylogeny. *Evolution* 62:2718–2726.
- 530 Bull, J. J., and E. L. Charnov. 1985. On irreversible evolution. *Evolution* 39:1149–1155.
- Charlesworth, D. 2015. Plant contributions to our understanding of sex chromosome evolution.  
532 *New Phytologist* 208:52–65.
- Felsenstein, J. 1981. Evolutionary trees from DNA sequences: a maximum likelihood approach.  
534 *Journal of Molecular Evolution* 17:368–376.
- . 2005. Using the quantitative genetic threshold model for inferences between and within  
536 species. *Philosophical Transactions of the Royal Society B: Biological Sciences* 360:1427–1434.
- Finarelli, J. A., and J. J. Flynn. 2006. Ancestral state reconstruction of body size in the Caniformia  
538 (Carnivora, Mammalia): the effects of incorporating data from the fossil record. *Systematic  
Biology* 55:301–313.
- 540 Freyman, W., and S. Höhna. in review. The tempo of evolutionary decline in self-compatible  
plant lineages. *bioRxiv* .
- 542 Goldberg, E. E., and B. Igić. 2008. On phylogenetic tests of irreversible evolution. *Evolution*  
62:2727–2741.
- 544 Goldberg, E. E., and B. Igić. 2012. Tempo and mode in plant breeding system evolution. *Evolution*  
66:3701–3709.
- 546 Goldberg, E. E., S. P. Otto, J. C. Vamosi, I. Mayrose, N. Sabath, R. Ming, and T.-L. Ashman. 2017.  
Macroevolutionary synthesis of flowering plant sexual systems. *Evolution* 71:898–912.
- 548 Goldman, N., and Z. Yang. 1994. A codon-based model of nucleotide substitution for protein-  
coding DNA sequences. *Molecular Biology and Evolution* 11:725–736.
- 550 Hagen, O., K. Hartmann, M. Steel, and T. Stadler. 2015. Age-dependent speciation can explain  
the shape of empirical phylogenies. *Systematic Biology* 64:432–440.
- 552 Hiscott, G., C. Fox, M. Parry, and D. Bryant. 2016. Efficient recycled algorithms for quantitative

- trait models on phylogenies. *Genome Biology and Evolution* 8:1338–1350.
- 554 Hunt, G. 2013. Testing the link between phenotypic evolution and speciation: an integrated  
palaeontological and phylogenetic analysis. *Methods in Ecology and Evolution* 4:714–723.
- 556 Lalley, S. 2016. Random walk lecture notes.
- Levy Karin, E., S. Wicke, T. Pupko, and I. Mayrose. 2017. An integrated model of phenotypic  
558 trait changes and site-specific sequence evolution. *Systematic Biology* 66:917–933.
- Lewis, P. O. 2001. A likelihood approach to estimating phylogeny from discrete morphological  
560 character data. *Systematic Biology* 50:913–925.
- Maddison, W. P., and R. G. FitzJohn. 2015. The unsolved challenge to phylogenetic correlation  
562 tests for categorical characters. *Systematic Biology* 64:127–136.
- Maddison, W. P., P. E. Midford, and S. P. Otto. 2007. Estimating a binary character’s effect on  
564 speciation and extinction. *Systematic Biology* 56:701–710.
- Magnuson-Ford, K., and S. P. Otto. 2012. Linking the investigations of character evolution and  
566 species diversification. *The American Naturalist* 180:225–245.
- Marshall, C. R., E. C. Raff, and R. A. Raff. 1994. Dollo’s law and the death and resurrection of  
568 genes. *Proceedings of the National Academy of Sciences* 91:12283–12287.
- Mayrose, I., and S. P. Otto. 2011. A likelihood method for detecting trait-dependent shifts in the  
570 rate of molecular evolution. *Molecular Biology and Evolution* 28:759–770.
- McGaugh, S. E., J. B. Gross, B. Aken, M. Blin, R. Borowsky, D. Chalopin, H. Hinaux, W. R. Jeffery,  
572 A. Keene, L. Ma, P. Minx, D. Murphy, K. E. O’Quin, S. Rétaux, N. Rohner, S. M. J. Searle, B. A.  
Stahl, C. Tabin, J.-N. Volff, M. Yoshizawa, and W. C. Warren. 2014. The cavefish genome reveals  
574 candidate genes for eye loss. *Nature Communications* 5:5307.
- Miller, G., and U. N. Bhat. 1997. Estimation for renewal processes with unobservable gamma or  
576 Erlang interarrival times. *Journal of Statistical Planning and Inference* 61:355–372.
- Neal, R. M. 2003. Slice sampling. *Annals of Statistics* 31:705–741.
- 578 Niemiller, M. L., B. M. Fitzpatrick, P. Shah, L. Schmitz, and T. J. Near. 2013. Evidence for repeated  
loss of selective constraint in rhodopsin of amblyopsid cavefishes (Teleostei: Amblyopsidae).  
580 *Evolution* 67:732–748.
- Nosil, P., and A. Ø. Mooers. 2005. Testing hypotheses about ecological specialization using  
582 phylogenetic trees. *Evolution* 59:2256–2263.
- O’Meara, B. C., C. Ané, M. J. Sanderson, and P. C. Wainwright. 2006. Testing for different rates



- 584 of continuous trait evolution using likelihood. *Evolution* 60:922–933.
- 585 Pagel, M. 1994. Detecting correlated evolution on phylogenies: a general method for the com-  
586 parative analysis of discrete characters. *Proceedings of the Royal Society of London, Series B*  
255:37–45.
- 588 Rabosky, D. L., and E. E. Goldberg. 2015. Model inadequacy and mistaken inferences of trait-  
dependent speciation. *Systematic Biology* 64:340–355.
- 590 Ree, R. H., B. R. Moore, C. O. Webb, and M. J. Donoghue. 2005. A likelihood framework for  
inferring the evolution of geographic range on phylogenetic trees. *Evolution* 59:2299–2311.
- 592 Revell, L. J. 2014. Ancestral character estimation under the threshold model from quantitative  
genetics. *Evolution* 68:743–759.
- 594 Ross, S. M. 2010. *Introduction to Probability Models*. 10th ed. Academic Press.
- Slater, G. J. 2013. Phylogenetic evidence for a shift in the mode of mammalian body size evolution  
596 at the Cretaceous-Palaeogene boundary. *Methods in Ecology and Evolution* 4:734–744.
- Slater, G. J., L. J. Harmon, and M. E. Alfaro. 2012. Integrating fossils with molecular phylogenies  
598 improves inference of trait evolution. *Evolution* 66:3931–3944.
- Stadler, T. 2013. Recovering speciation and extinction dynamics based on phylogenies. *Journal*  
600 *of Evolutionary Biology* 26:1203–1219.
- Tarasov, S. in review. Integration of anatomy ontologies and evo-devo using structured Markov  
602 models suggests a new framework for modeling discrete phenotypic traits. *bioRxiv* .
- Wessinger, C. A., and M. D. Rausher. 2015. Ecological transition predictably associated with gene  
604 degeneration. *Molecular Biology and Evolution* 32:347–354.
- Whittall, J. B., and S. A. Hodges. 2007. Pollinator shifts drive increasingly long nectar spurs in  
606 columbine flowers. *Nature* 447:706–709.
- Wright, S. 1934. The results of crosses between inbred strains of guinea pigs, differing in number  
608 of digits. *Genetics* 19:537–551.
- Zenil-Ferguson, R., J. M. Ponciano, and J. G. Burleigh. 2017. Testing the association of phenotypes  
610 with polyploidy: An example using herbaceous and woody eudicots. *Evolution* 71:1138–1148.

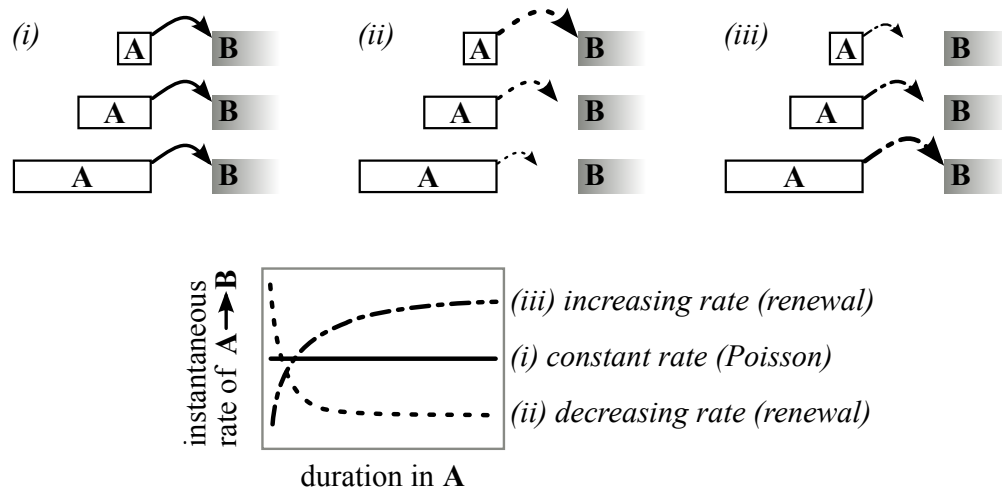

Figure 1: Transitions from state  $A$  to state  $B$  may be (i) independent of how long a lineage has held state  $A$ , (ii) less likely as  $A$  has been held for longer, or perhaps (iii) more likely as  $A$  has been held for longer. Possible corresponding hazard functions are shown in the lower panel. These are hazard functions of the Gamma distribution, which is specified by 'shape' and 'rate' parameters. The hazard is (i) flat when shape = 1, (ii) decreasing when  $0 < \text{shape} < 1$ , or (iii) increasing when shape  $> 1$ . The rate parameter is the value after a very long duration in  $A$ .

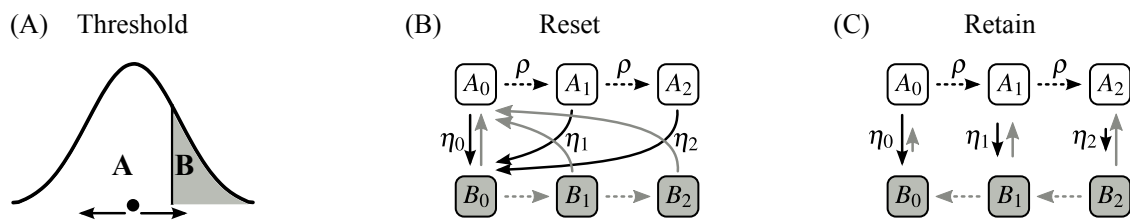

Figure 2: Three models for the evolution of a trait that can take observable states  $A$  or  $B$ . (A) In the Threshold model, a liability value evolves on a continuous scale, and the corresponding discrete state is determined by whether the liability is less than or greater than a threshold value. (B) In the Reset model, changes accrue while a lineage holds a state, and flips to the other state always reset the value to the corresponding initial substate ( $A_0$  or  $B_0$ ). (C) In the Retain model, changes also accrue but in opposite directions for each state, and the substate value is retained upon transition to the other observed state. In (B) and (C), dashed arrows show transitions between unobserved substates (with rates  $\rho$ ) and solid arrows show flips to the other observed state (with rates  $\eta_i$ ).

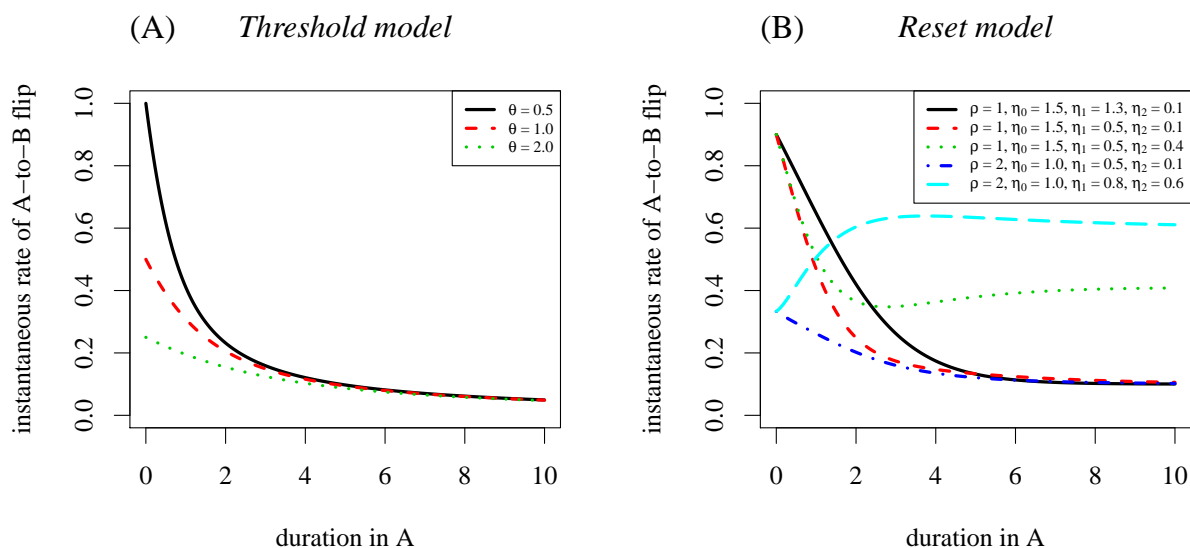

Figure 3: Hazard functions for the Threshold and Reset models. (A) In the symmetric random walk threshold model (fig. 2A), the rate of flips to state  $B$  always decreases with time spent in  $A$  (eq. [1]). Larger values of  $\theta$  correspond to less time between steps, so the liability more quickly wanders away from the threshold. (B) In the model where the subtraits are reset upon a flip to the other state (fig. 2B), a variety of hazard function shapes are possible even when  $\eta_0 > \eta_1 > \eta_2$  (eq. [2]). In many situations, the rate of flips to state  $B$  decreases with time spent in  $A$ . But when progression within a state (at rate  $\rho$ ) outpaces flips to the other state (rates  $\eta_i$ ), the dynamics can be drawn into a longer path from  $A$  to  $B$ .

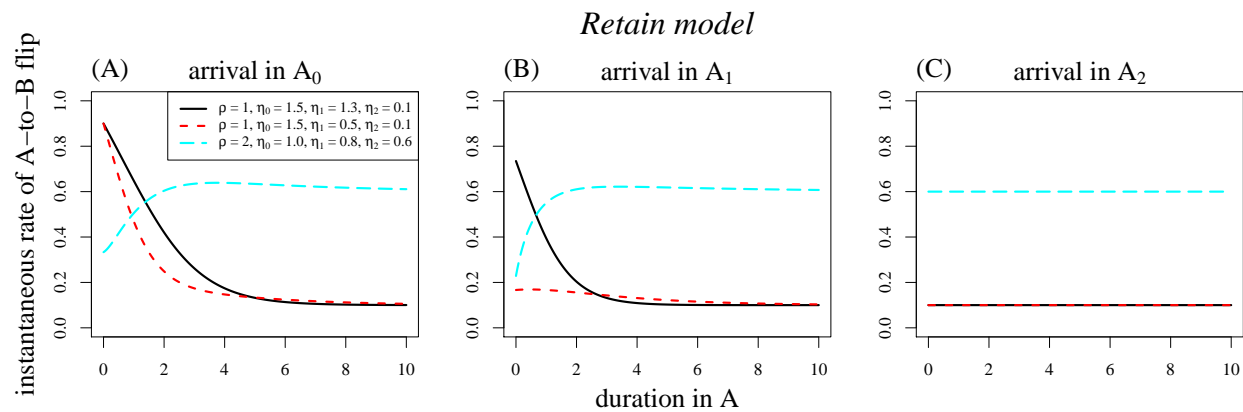

Figure 4: Hazard functions for the Retain model. For the scenario in which adaptation subtraits are retained upon a flip in the focal trait (fig. 2C), the rate of flips to state  $B$  depends on whether the initial substate was  $A_0$ ,  $A_1$ , or  $A_2$  (panels A, B, and C, respectively). This precludes the use of a two-state renewal process framework.

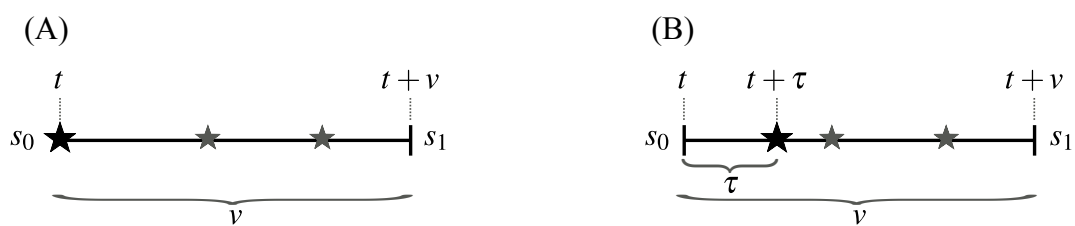

Figure 5: Renewals on a single lineage, used to compute transition probabilities. The initial state is  $s_0$  and the final state is  $s_1$ . Renewals are labeled with stars, large and black for the focal event, and small and gray for subsequent events that may or may not occur.

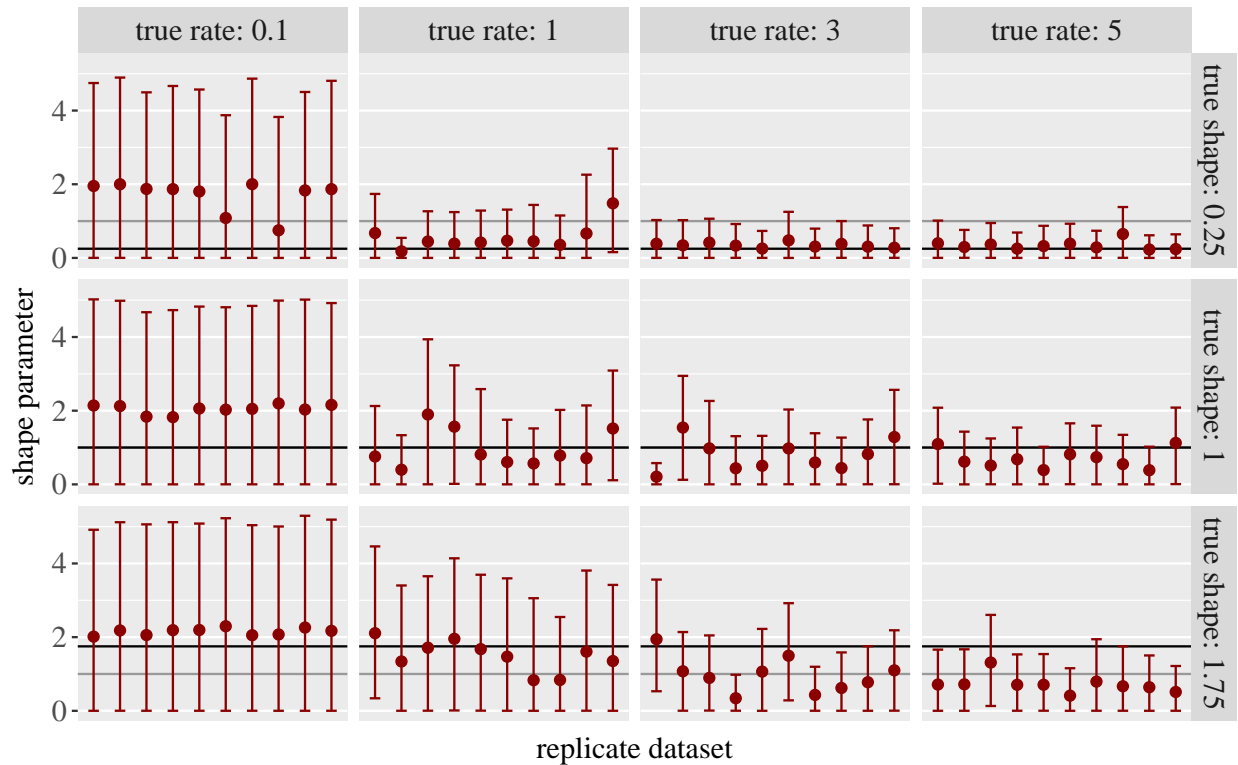

Figure 6: Inference results for trait evolution simulations. In each panel, results are shown for 10 datasets, each simulated on a tree with 500 tips and a root age of 1. A Gamma distribution of waiting times was used to simulate trait evolution, and its ‘shape’ and ‘rate’ parameter values are shown in the panel labels. The hazard function is either decreasing (shape of 0.25, top row), flat (shape of 1, middle row), or increasing (shape of 1.75, bottom row); these true values are marked with black horizontal lines. The full hazard functions are plotted in figure S1. The key inference question is whether the shape parameter is distinguishable from 1 (emphasized with a darker gray guide line). Inference of the shape parameter is summarized here based on the MCMC results, showing median values (points) and 90% credibility intervals (whiskers). Corresponding estimates of the rate parameter are shown in figure S2.

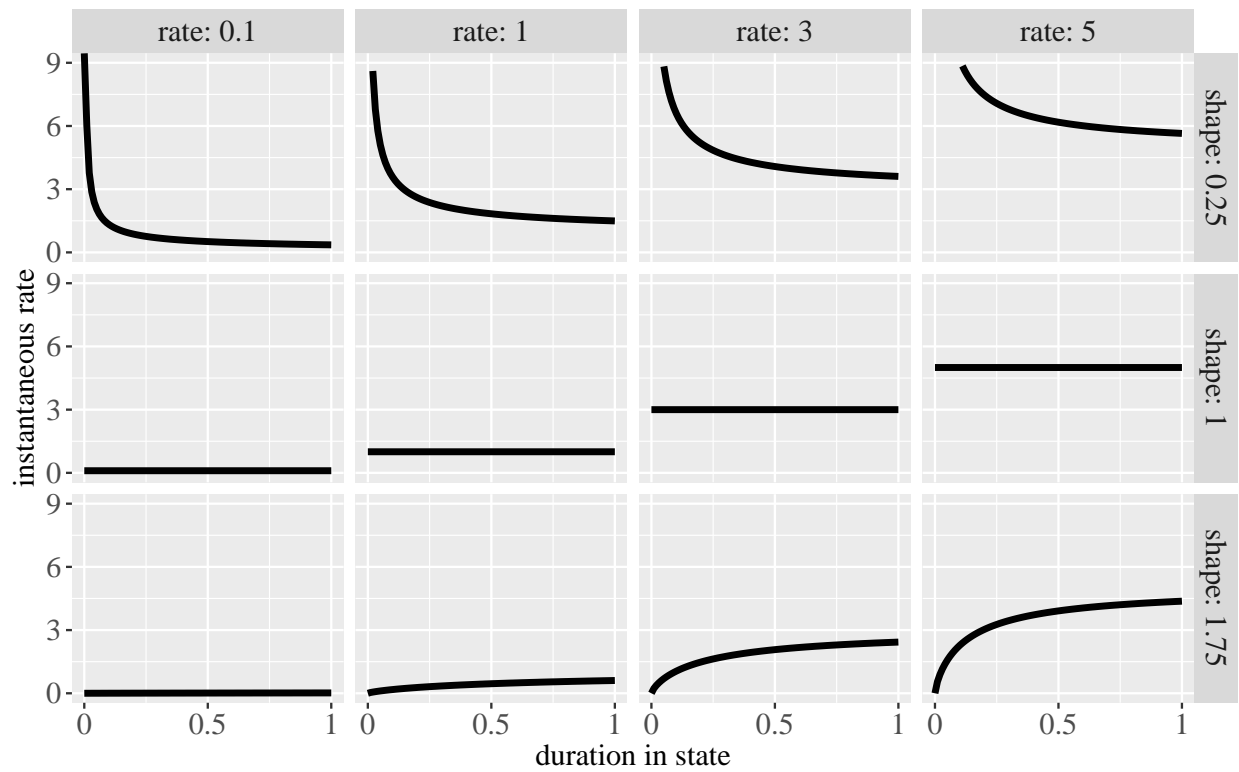

Figure S1: Hazard functions used for simulation tests reported in figure 6 and figure S2.



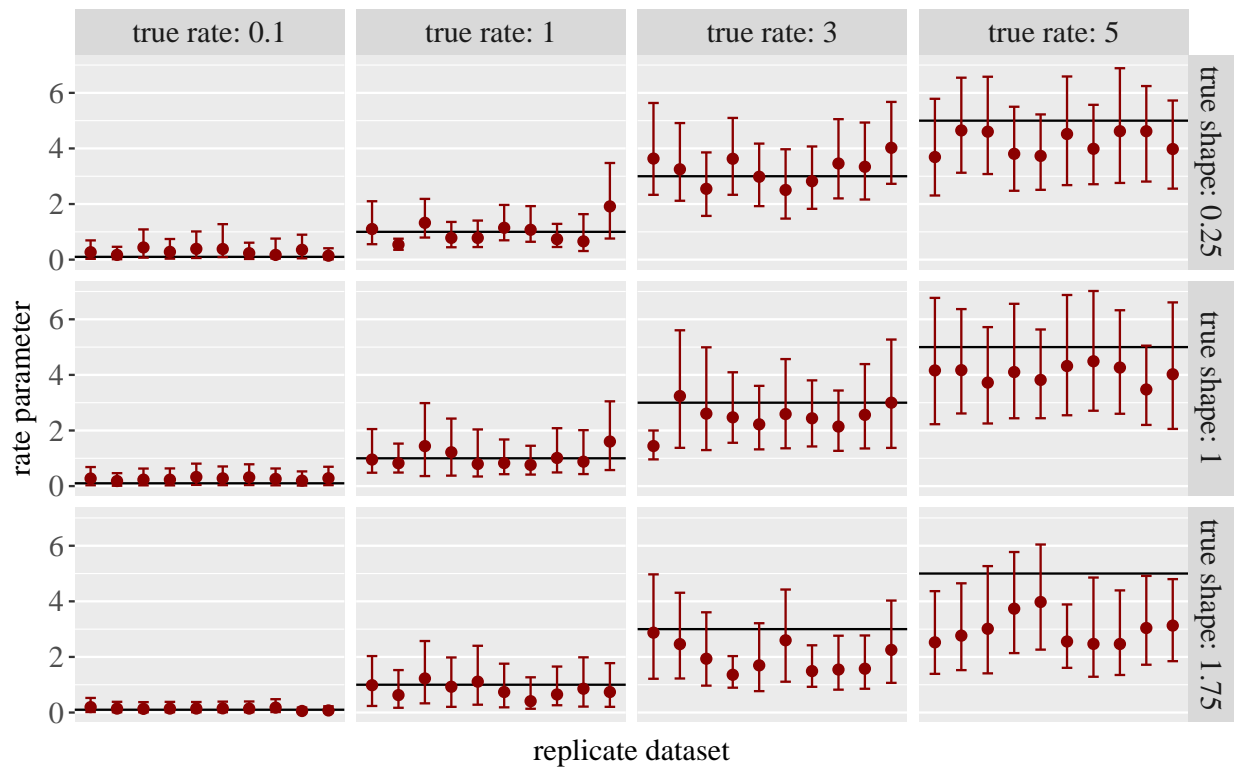

Figure S2: More inference results for trait evolution simulations. For the same simulated datasets, estimates of the shape parameter are shown in figure 6 and estimates of the rate parameter are shown here.

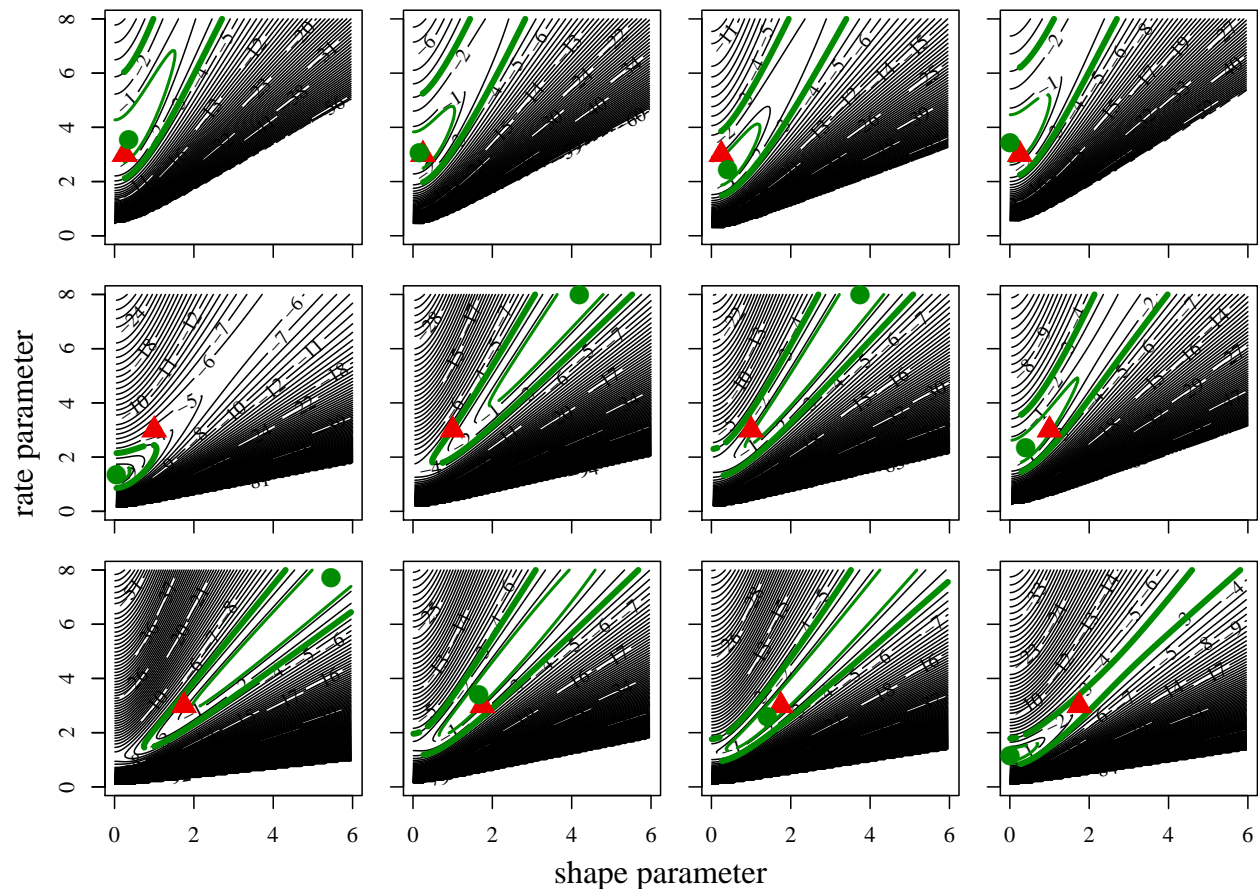

Figure S3: Log-likelihood surfaces for ten simulated datasets on trees with 500 tips. Datasets are the first four for each shape value, with a rate value of 3, in figure 6 and figure S2. True parameter values are marked with red triangles. Maximum likelihood estimates are marked with green circles. Black contour line spacing is 1 log-likelihood unit, and the log-likelihood values are normalized so that the maximum is 0. Green contours additionally mark the 50% and 95% likelihood ratio confidence intervals, computed with the chi-squared approximation.
